# Supplementary material
Source: PubMed Central journal article supplement (PMC9297623)
Supplement: 12913_2022_8317_MOESM2_ESM.pdf [file 12913_2022_8317_MOESM2_ESM.pdf]

# Caregiving Activities

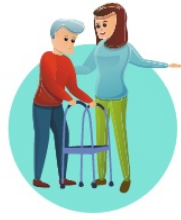

## Basic activities of daily living:

Feeding, Bathing, Walking

## Shopping, Housekeeping, Food preparation

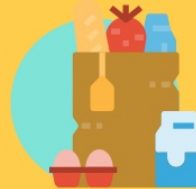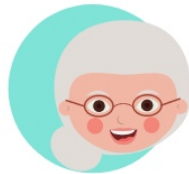

## Ensuring physical and mental well-being

## Managing medical condition(s)

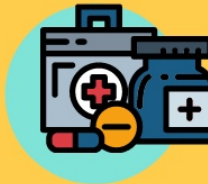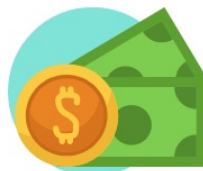

## Managing finances

## Decision making

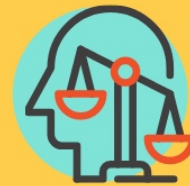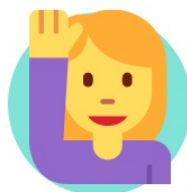

## Advocacy needs

## Coordination of care needs

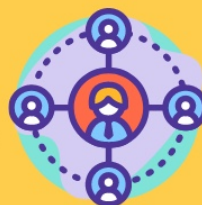

# Physical Impacts of Caregiving

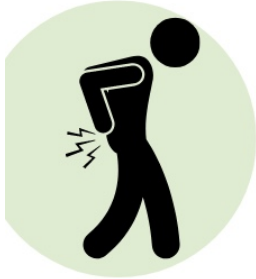

## Back pain and muscle aches

Resulting from poor transferring techniques, improper posture or lack of assistance

## Weight loss or gain

From changes in eating habits

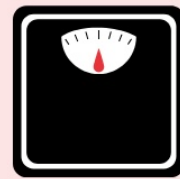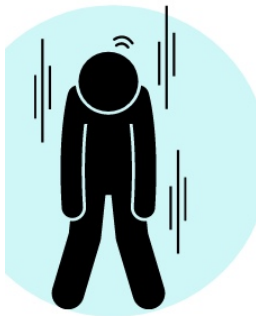

## Fatigue

From having to juggle multiple roles

## Poor sleep

From interrupted rest

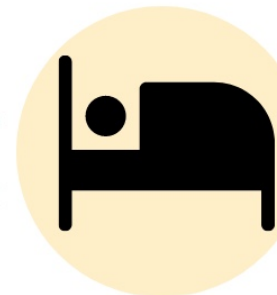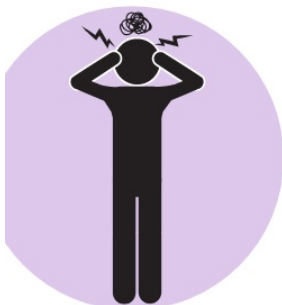

## Headache

From insufficient rest

The lack of time and energy may cause you to neglect your own health. It is important to look after yourself while taking care of your care recipient.

## Practise self-care

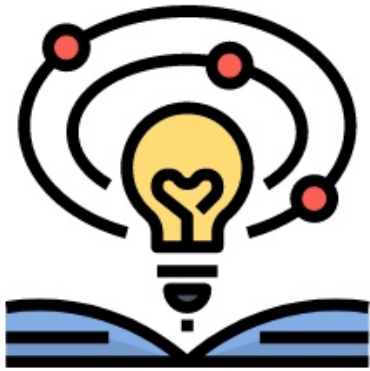

### **Knowledge and Skills of Caregiving**

What caregiver  
knowledge and skills  
do I need?  
Where can I find  
them?

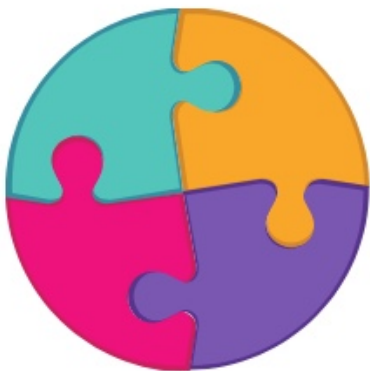

### **Strategies to Cope with Caregiving**

How can I cope  
with the challenges  
and demanding  
nature of  
caregiving?

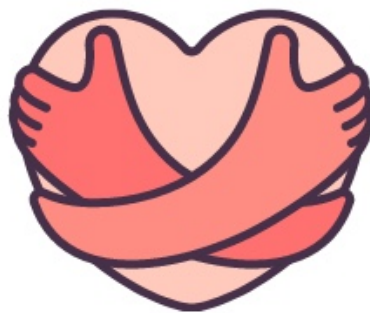

### **Supporting Yourself**

How can I care  
for myself?

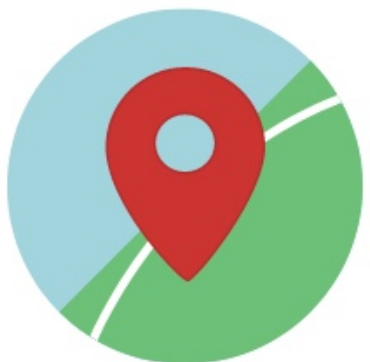

### **System Navigation**

What are the  
available community  
resources?  
Where can I find  
them?

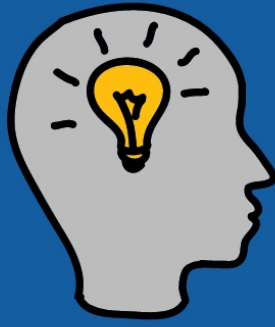

# Problem-solving Technique

5 steps to help you problem solve during your caregiving journey.

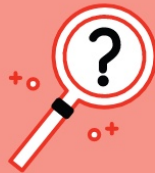

## 1. Define the Problem

Identify the root problem

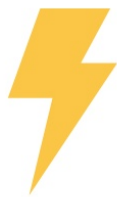

## 2. Brainstorm Solutions

Think of all possible solutions and write them down

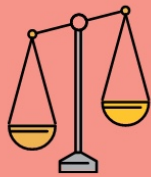

## 3. Weigh Pros & Cons

List the benefits and drawbacks of each solution

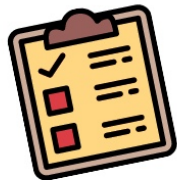

## 4. Choose Solution and Action Plan

- Choose the solution with the most benefits and least drawbacks
- Plan out how you will carry out the solution

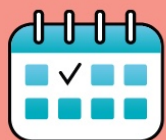

## 5. Evaluate Outcomes

Set a timeline to check if the solution is working
